# Supplementary material for: A toolbox of genes, proteins, metabolites and promoters for improving drought tolerance in soybean includes the metabolite coumestrol and stomatal development genes
Source: PubMed Central journal article supplement (PMC4746818; doi:10.1186/s12864-016-2420-0), 2016-02-09
Supplement: 12864_2016_2420_MOESM3_ESM.pdf [file 12864_2016_2420_MOESM3_ESM.pdf]

a.

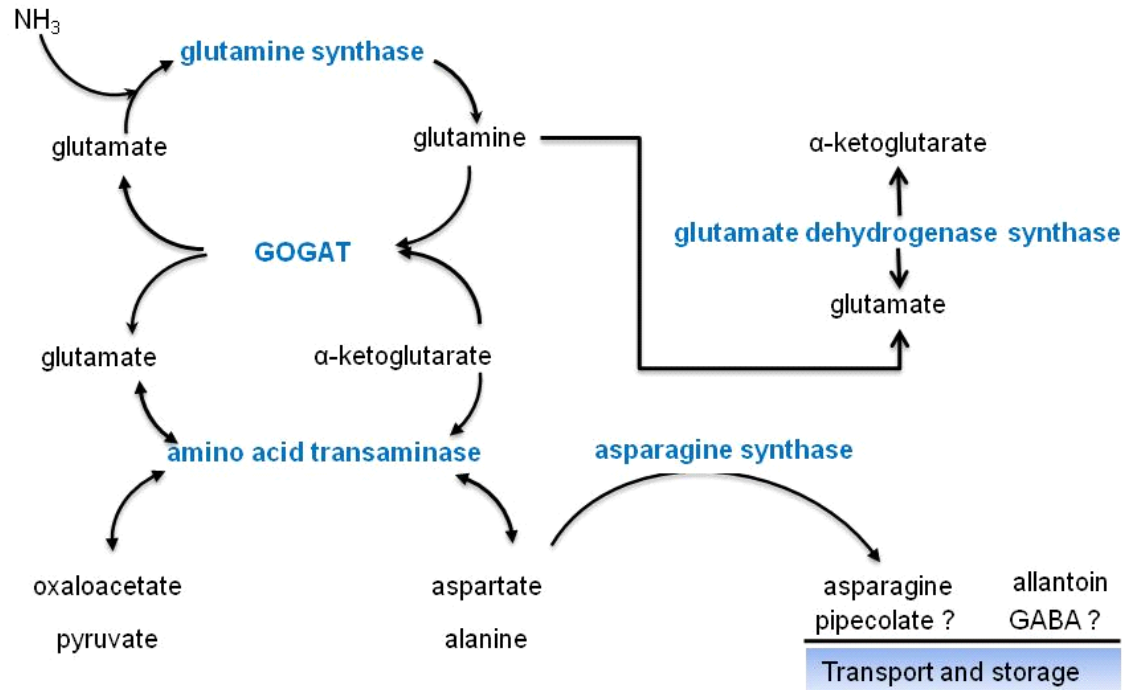

b.

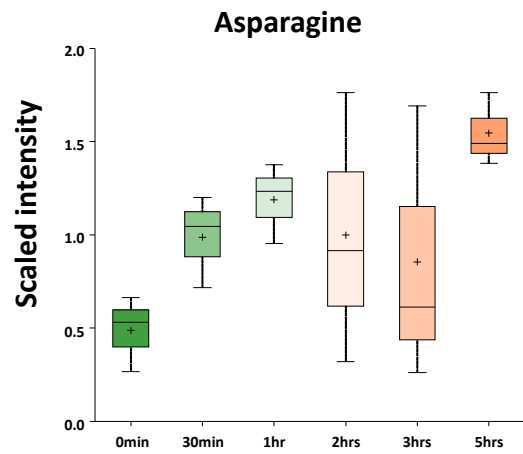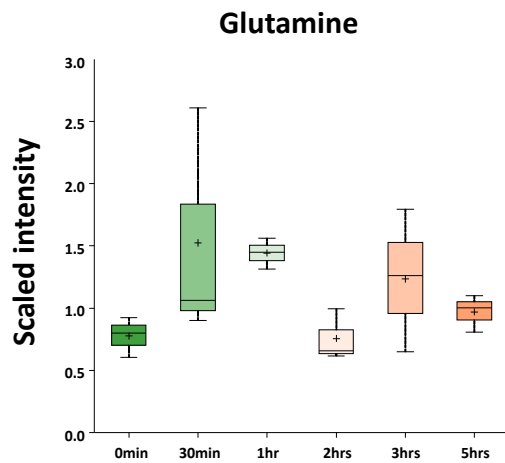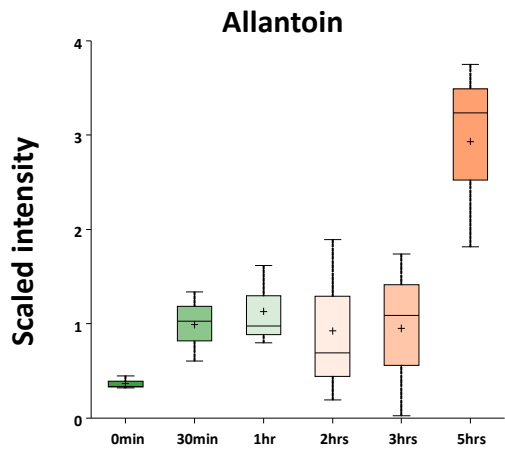

c.

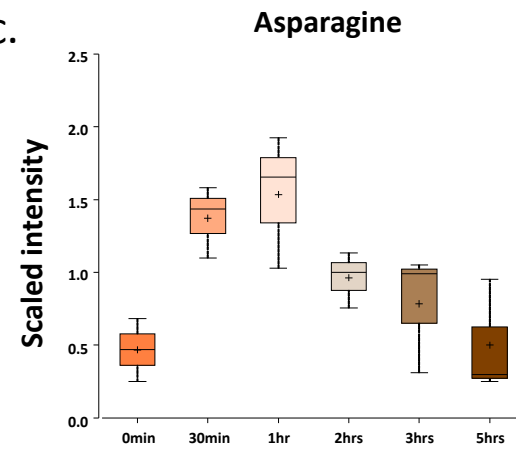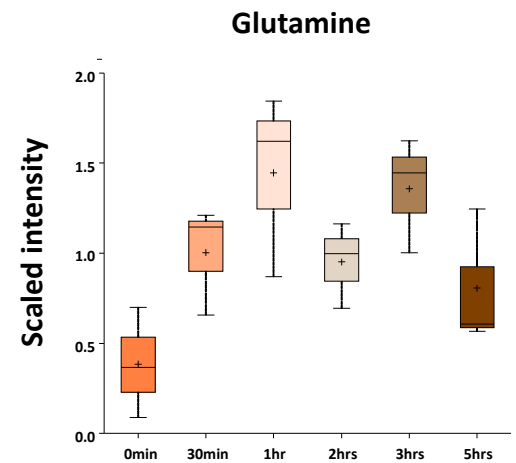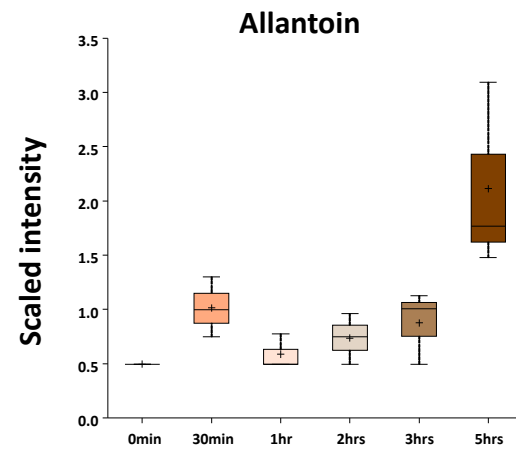

d.

| Biochemical Name | Fold Change      |                  |                   |                   |                   |
|------------------|------------------|------------------|-------------------|-------------------|-------------------|
|                  | $\frac{T30}{T0}$ | $\frac{T60}{T0}$ | $\frac{T120}{T0}$ | $\frac{T180}{T0}$ | $\frac{T300}{T0}$ |
| Root             |                  |                  |                   |                   |                   |
| allantoin        | 2.05             | 1.19             | 1.49              | 1.77              | 4.27              |
| allantoic acid   | 2.99             | 1.62             | 1.23              | 1.76              | 2.29              |
| asparagine       | 2.94             | 3.29             | 2.06              | 1.68              | 1.07              |
| glutamine        | 2.6              | 3.75             | 2.47              | 3.52              | 2.09              |
| Leaf             |                  |                  |                   |                   |                   |
| allantoin        | 2.69             | 3.07             | 2.51              | 2.59              | 7.97              |
| asparagine       | 2.03             | 2.44             | 2.05              | 1.76              | 3.17              |
| glutamine        | 1.97             | 1.86             | 0.97              | 1.59              | 1.25              |

**Figure S2.** Metabolite analysis of the ammonia detoxification processes. (a) Biosynthetic pathways associated with ammonia detoxification. (b) Box plot of asparagine, glutamine, and allantoin levels in leaf (b) and root (c). Crosses indicate the mean value, horizontal lines the median value, shaded boxes indicate the upper and lower quartiles, and the top and bottom of the bars indicate the maximum and minimum of the distribution. (d) Heat map of statistically significant changes in asparagine, glutamine, and allantoin levels. Red cells indicate  $p \leq 0.05$  with the mean values significantly higher than the control. Light red cells indicate  $0.05 < p < 0.10$ .
