# Supplementary material for: A toolbox of genes, proteins, metabolites and promoters for improving drought tolerance in soybean includes the metabolite coumestrol and stomatal development genes
Source: PubMed Central journal article supplement (PMC4746818; doi:10.1186/s12864-016-2420-0), 2016-02-09
Supplement: 12864_2016_2420_MOESM5_ESM.pdf [file 12864_2016_2420_MOESM5_ESM.pdf]

a.

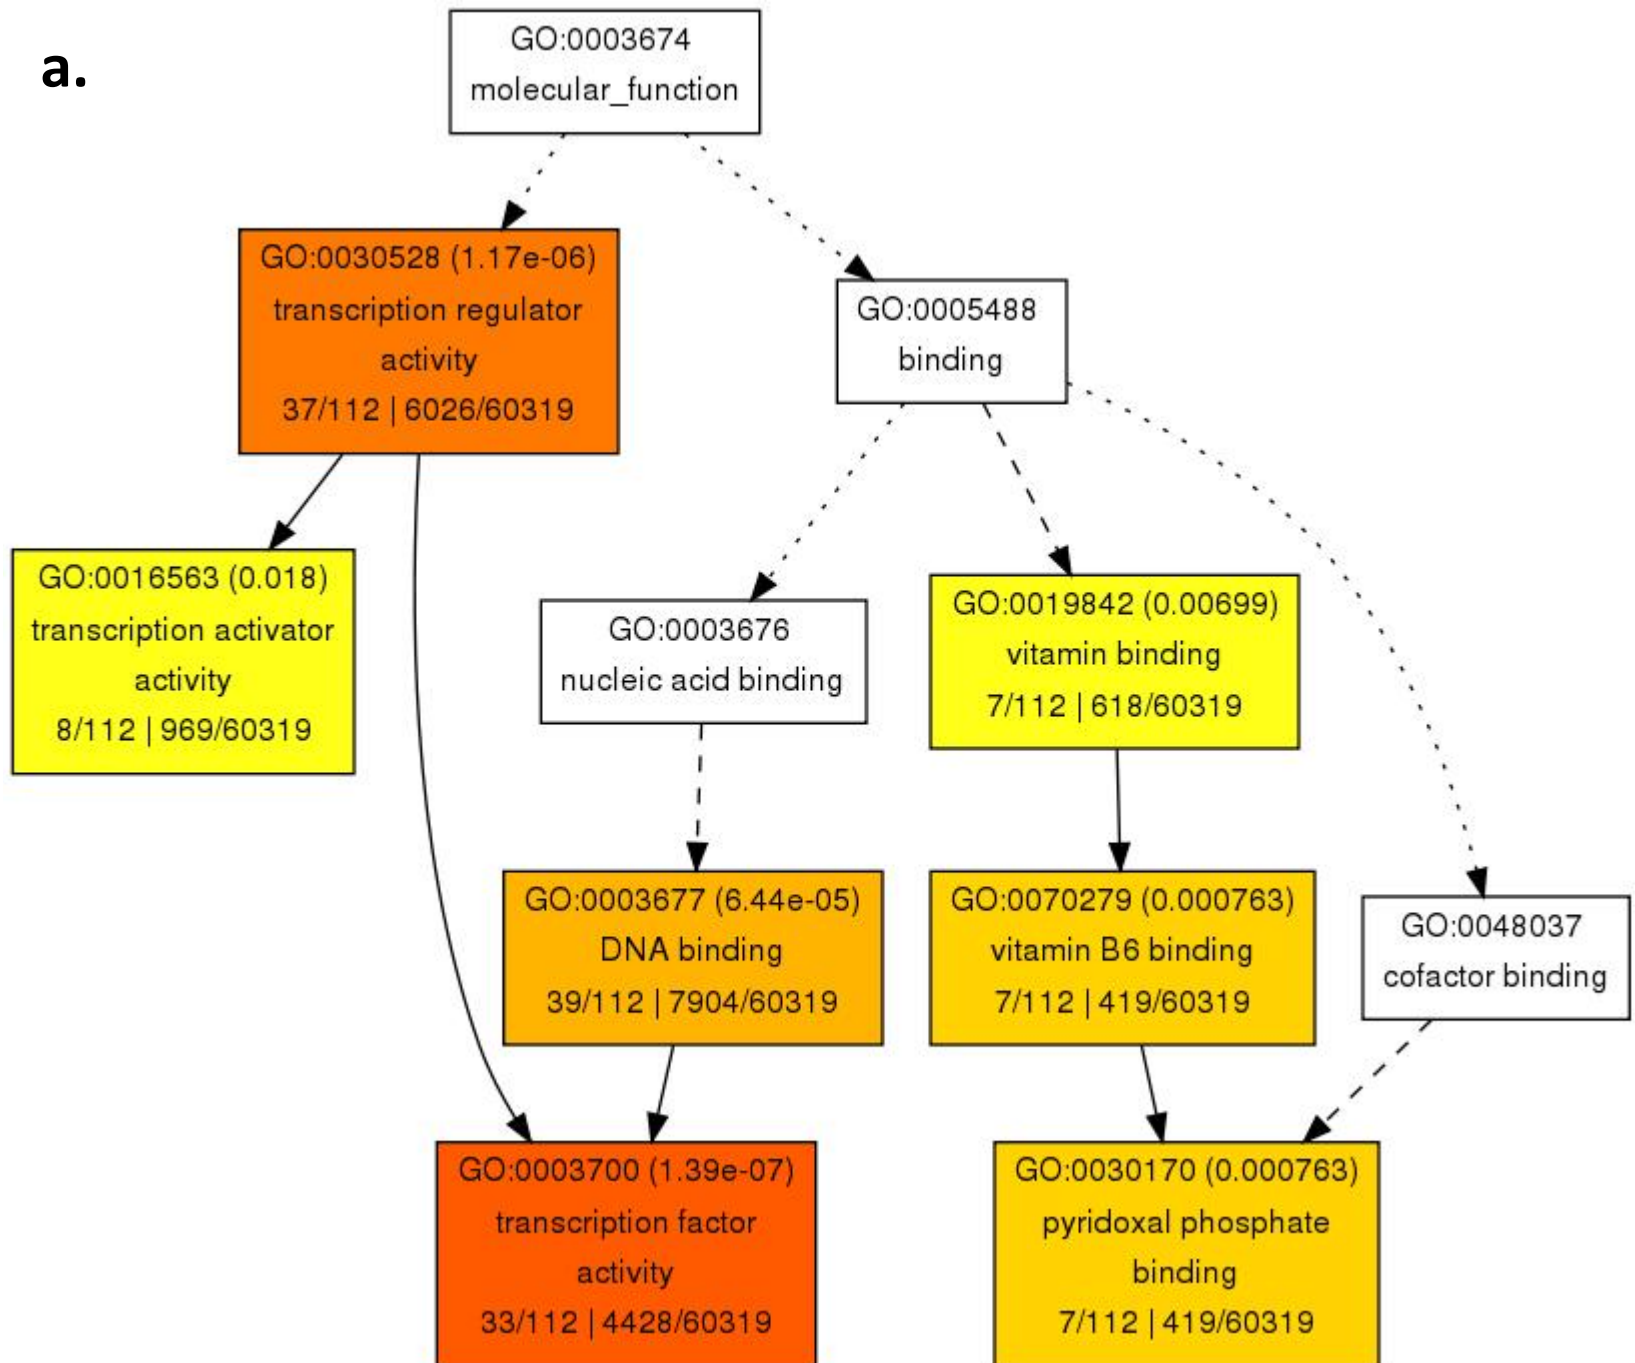

**b.**

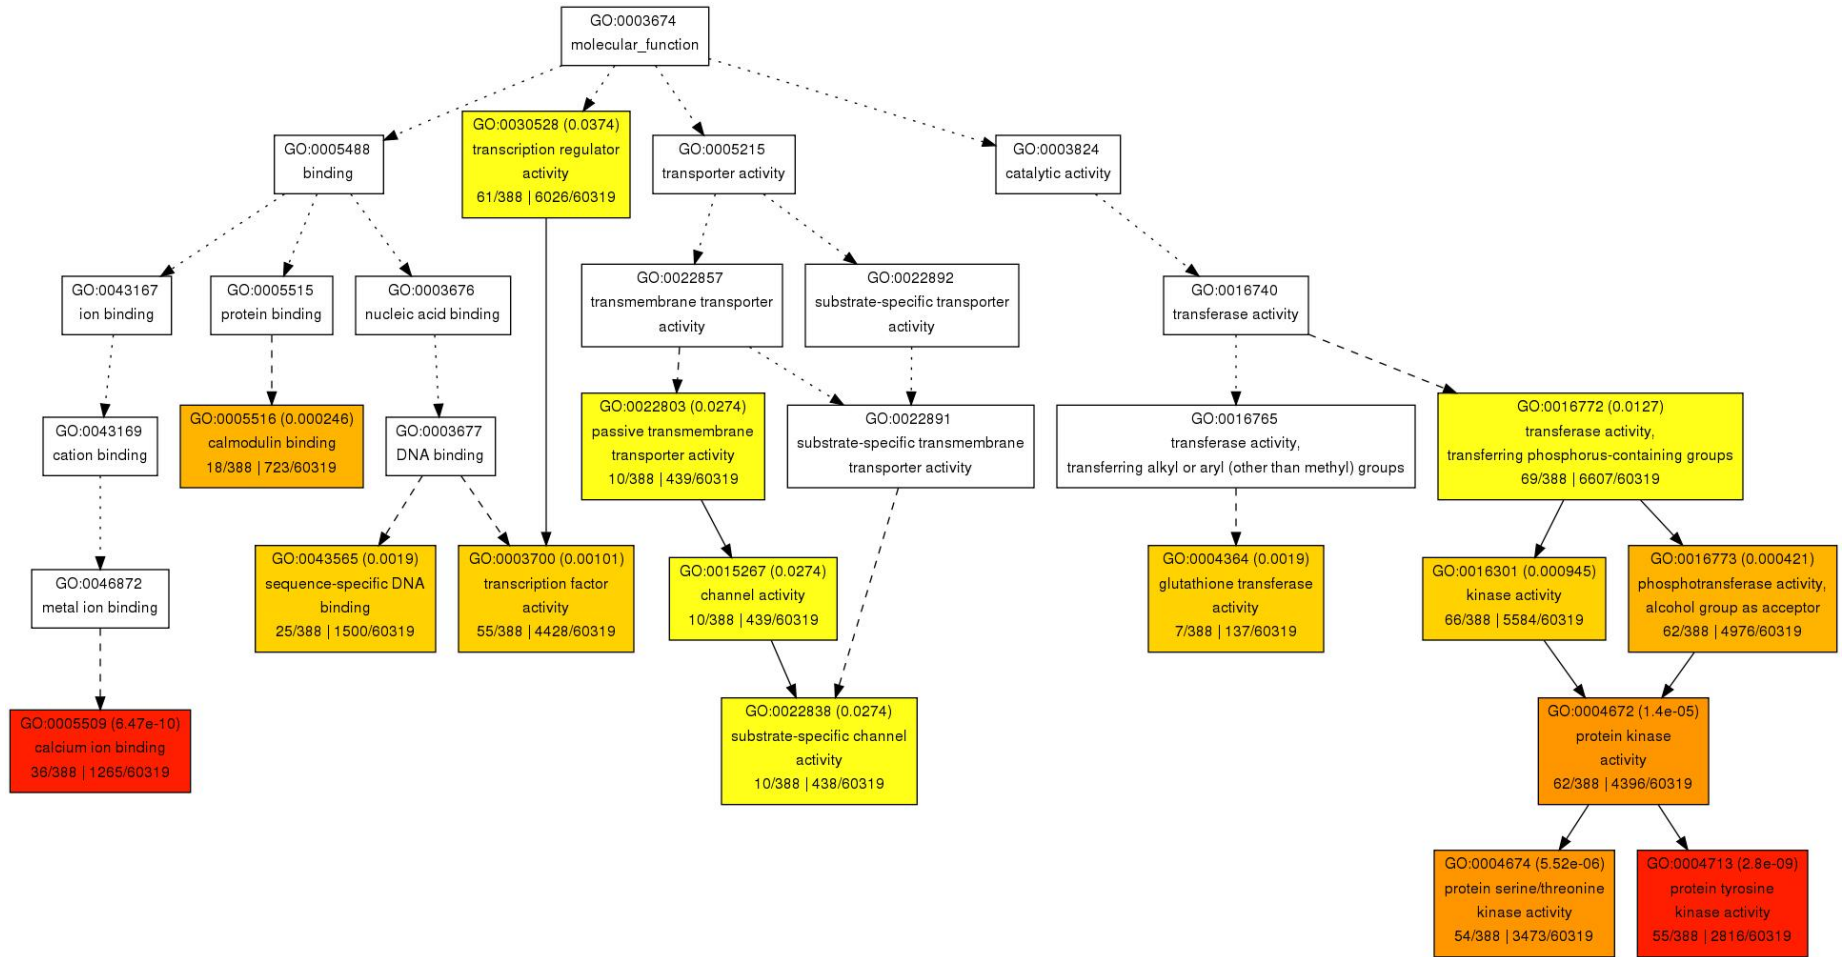

**Figure S3.** Gene ontology analysis. (a) Molecular Function category enriched GO terms in roots after 30 minutes of water stress. (b) Molecular Function category enriched GO terms in leaf after two hours of water stress. agriGO was employed for analysis and enriched GO terms were obtained using Singular Enrichment Analysis. Colors reflect the level of significance.
