# Supplementary material for: A toolbox of genes, proteins, metabolites and promoters for improving drought tolerance in soybean includes the metabolite coumestrol and stomatal development genes
Source: PubMed Central journal article supplement (PMC4746818; doi:10.1186/s12864-016-2420-0), 2016-02-09
Supplement: 12864_2016_2420_MOESM15_ESM.pdf [file 12864_2016_2420_MOESM15_ESM.pdf]

a.

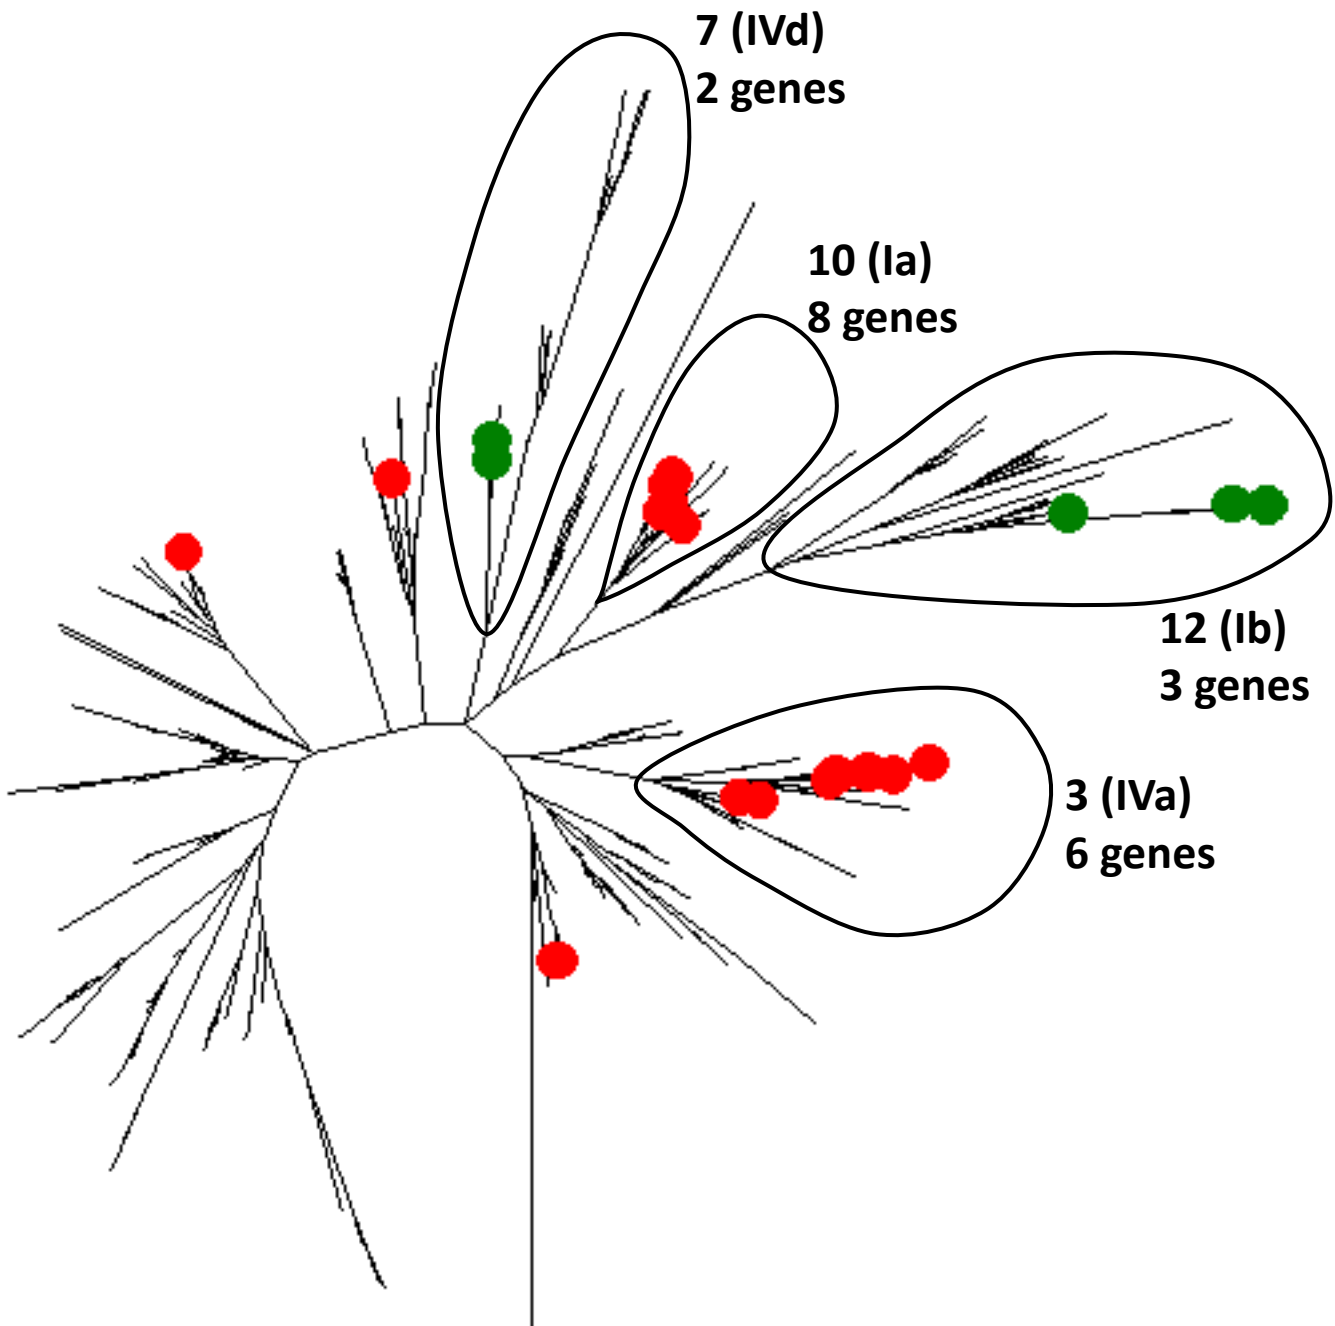

**b.**

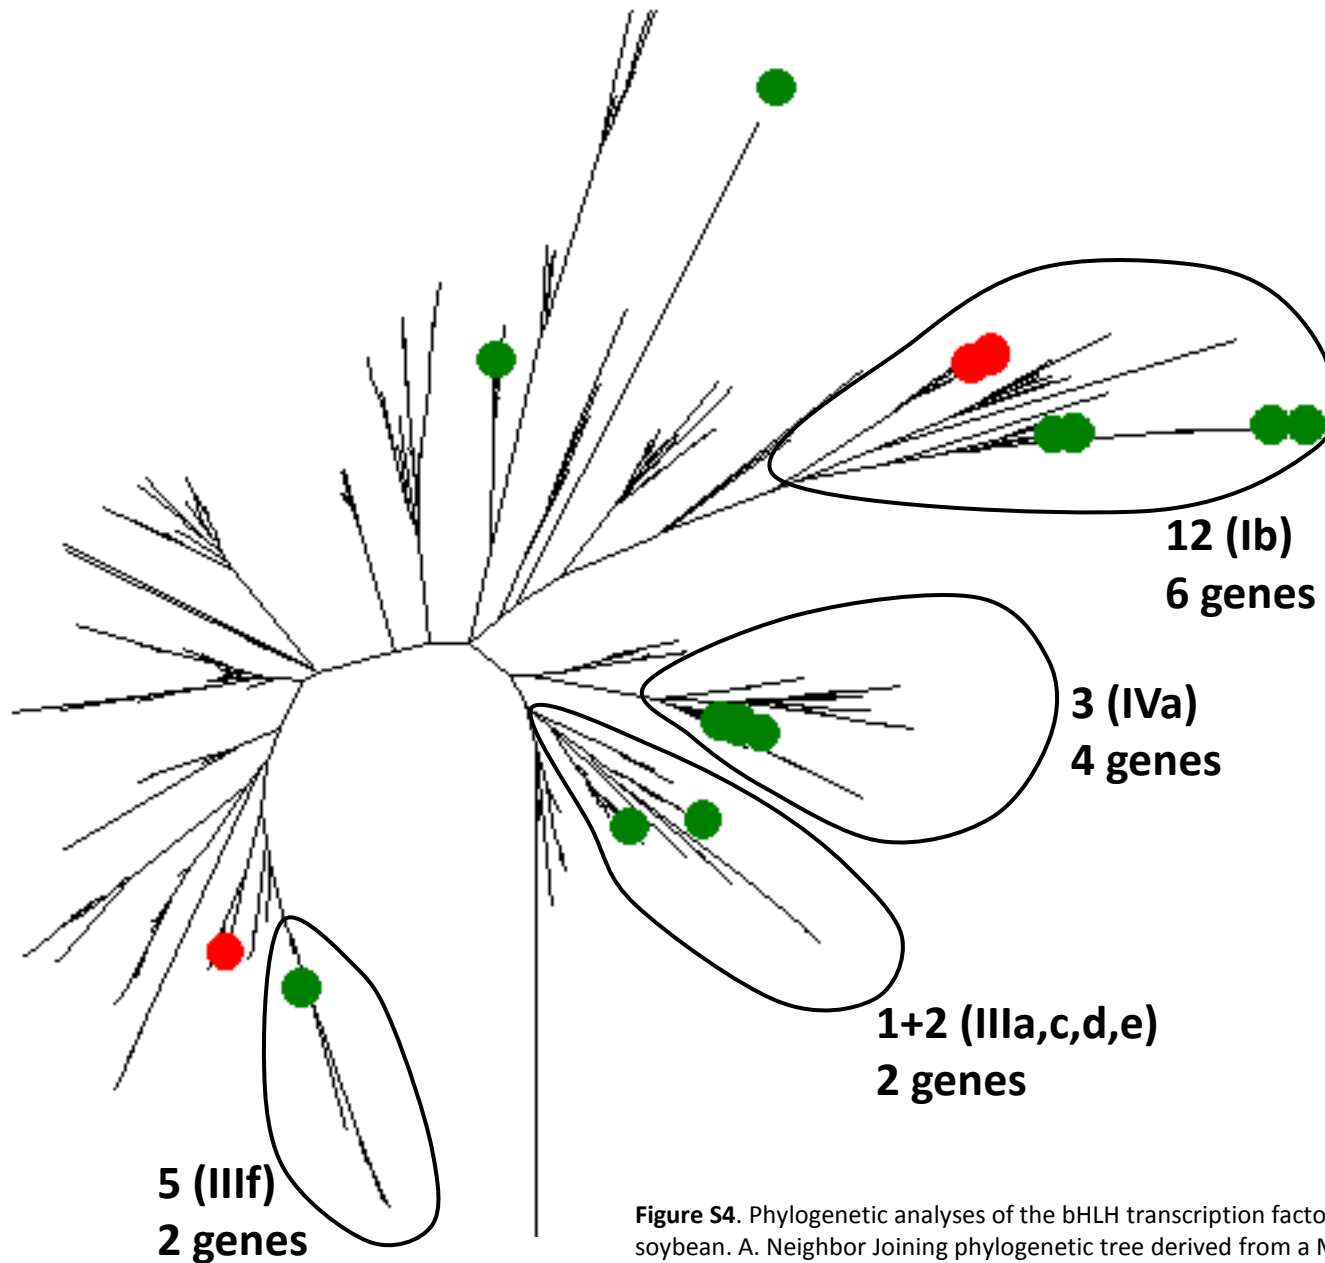

**Figure S4.** Phylogenetic analyses of the bHLH transcription factor family from soybean. A. Neighbor Joining phylogenetic tree derived from a MUSCLE alignment of the full length proteins. Red dots denote 8-fold down-regulation and green dots 8-fold up-regulation in roots. B. The same phylogenetic tree as shown in A. but with the inducibilities in leaf.
