# Supplementary material for: A toolbox of genes, proteins, metabolites and promoters for improving drought tolerance in soybean includes the metabolite coumestrol and stomatal development genes
Source: PubMed Central journal article supplement (PMC4746818; doi:10.1186/s12864-016-2420-0), 2016-02-09
Supplement: 12864_2016_2420_MOESM17_ESM.pdf [file 12864_2016_2420_MOESM17_ESM.pdf]

**GmWRKY17****GmWRKY67**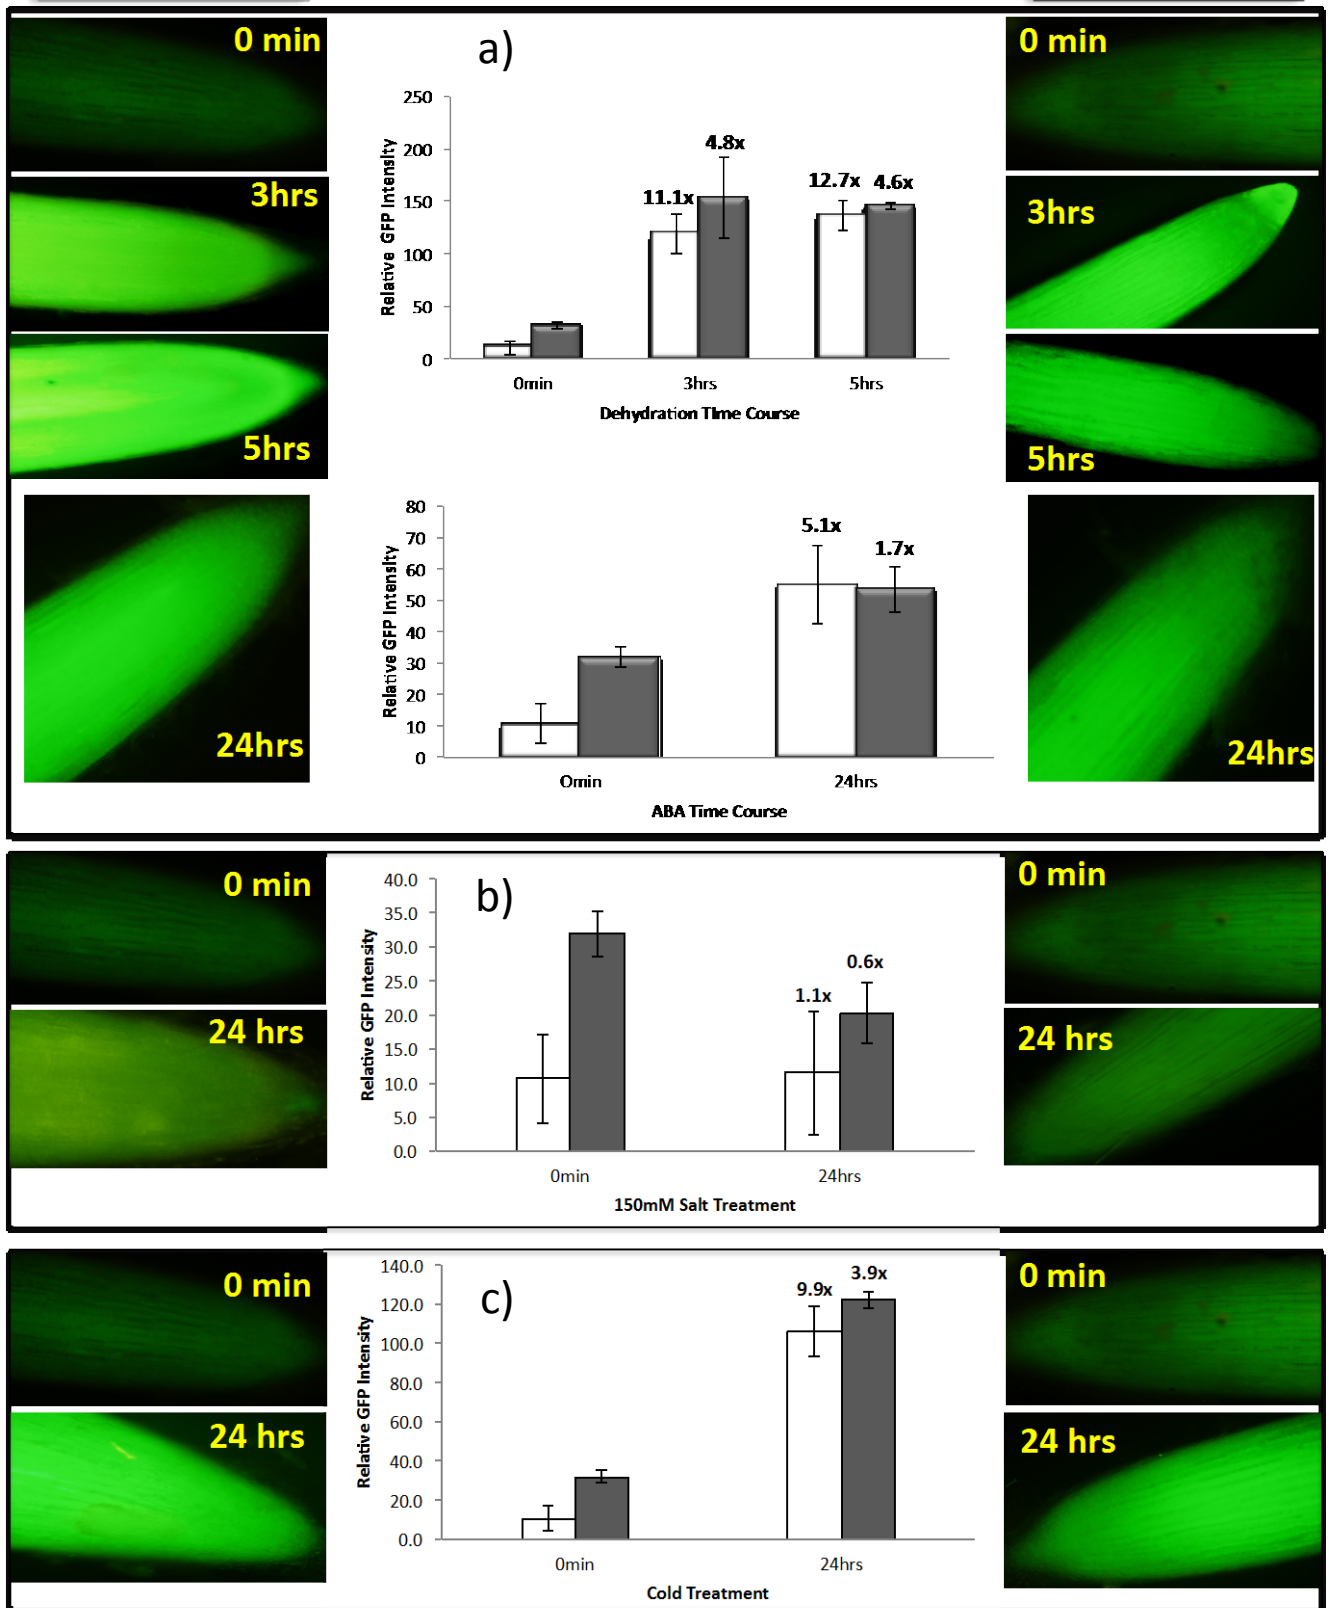

**Figure 9.** Validation of promoter activity of *GmWRKY17* and *GmWRKY67* in soybean hairy-roots during dehydration and 20 $\mu$ M ABA treatment. Validation of promoter activity via visualization and quantification of a promoter:GFP construct of *GmWRKY17* and *GmWRKY67* in soybean hairy-roots during (a) dehydration (b) 20 $\mu$ M ABA treatment and (c) cold. The time points in hours are shown. The graph shows mean  $\pm$  standard error for 9 independent plants for each time point. The fold inducibilities are indicated.
